# Supplementary material for: Increased presence of mammal-eating killer whales in the Salish Sea with implications for predator-prey dynamics
Source: PeerJ. 2018 Dec 4;6:e6062. doi: 10.7717/peerj.6062 (PMC6284519; doi:10.7717/peerj.6062)
Supplement: Table S1 — Raw data for number of days the Southern Resident and West Coast Transient killer whale populations were in the Salish Sea from the months of April–September between 2002–2017. Data compiled from Orca Network sightings reports. [file peerj-06-6062-s001.xlsx]

## Sheet: Sheet1
	Southern Residents	West Coast Transients
2002	150	31
2003	154	33
2004	152	38
2005	149	94
2006	133	33
2007	132	37
2008	130	49
2009	135	62
2010	124	75
2011	126	73
2012	110	68
2013	64	77
2014	116	104
2015	135	118
2016	98	110
2017	54	141
