# Supplementary material for: Increased presence of mammal-eating killer whales in the Salish Sea with implications for predator-prey dynamics
Source: PeerJ. 2018 Dec 4;6:e6062. doi: 10.7717/peerj.6062 (PMC6284519; doi:10.7717/peerj.6062)
Supplement: Table S2 — Raw data for total number of occurrences by month across three 7-year time periods. 1987–1993 data from (Baird & Dill, 1995). 2004–2010 data from (Houghton et al., 2015). [file peerj-06-6062-s002.xlsx]

## Sheet: Sheet1
	2011	2012	2013	2014	2015	2016	2017
Jan	4	1	5	1	6	6	9
Feb	2	4	3	5	4	4	7
Mar	7	4	7	9	9	7	10
Apr	14	12	13	17	15	16	24
May	13	11	13	18	19	22	14
Jun	11	9	7	11	20	19	24
Jul	5	2	12	10	5	10	23
Aug	8	9	12	19	16	15	32
Sep	6	12	16	16	7	19	35
Oct	3	4	8	5	13	8	10
Nov	2	12	7	5	9	6	5
Dec	3	3	5	5	5	3	8
